# Supplementary material for: Neoantigen identification strategies enable personalized immunotherapy in refractory solid tumors
Source: JCI journal article supplement (doi:10.1172/jci99538), 2019-03-05

## SUPPLEMENTAL INFORMATION

### *Table of Contents*

|                                                                                                                                                    |           |
|----------------------------------------------------------------------------------------------------------------------------------------------------|-----------|
| <b>SUPPLEMENTARY METHODS .....</b>                                                                                                                 | <b>3</b>  |
| <b>SUPPLEMENTARY TABLES.....</b>                                                                                                                   | <b>4</b>  |
| Supplemental Table 1. Overview of identified neoantigens by targeted sequencing guided de novo synthesis model.....                                | 4         |
| Supplemental Table 2. HLA-I and HLA-II alleles in 17 patients with refractory solid tumors.....                                                    | 5         |
| Supplemental Table 3. Candidate HLA-I and HLA-II alleles binding peptides for patient A008.....                                                    | 6         |
| Supplemental Table 4. Candidate HLA-A*0201-binding epitopes for patient A017...                                                                    | 7         |
| Supplemental Table 5. HLA-A*02-restricted irrelevant mutant peptides for patient A017.....                                                         | 8         |
| Supplemental Table 6. Predicted HLA-A*0201-binding affinity.....                                                                                   | 9         |
| Supplemental Table 7. Candidate HLA-binding peptides for patient A004.....                                                                         | 10        |
| Supplemental Table 8. Candidate HLA-binding peptides for patient A015.....                                                                         | 11        |
| Supplemental Table 9. High-frequency mutant genes in common solid tumors (COSMIC).....                                                             | 12        |
| Supplemental Table 10. Alteration frequency of 21 mutant genes in nine common solid tumors (TCGA).....                                             | 13        |
| Supplemental Table 11. Alteration frequency of hotspot mutations in common solid tumors (COSMIC).....                                              | 14        |
| Supplemental Table 12. Peptides eliciting IFN- $\gamma$ release from PBMC measured by ELISPOT and CBA using shared neoantigen peptide library..... | 17        |
| Supplemental Table 13. Phenotypic characteristics of the adoptive transfer cells (bulk T cells and DCs).....                                       | 18        |
| Supplemental Table 14. Clinical characteristics of 6 patients receiving personalized immunotherapy.....                                            | 19        |
| Supplemental Table 15. Treatment scheme and clinical responses after personalized immunotherapy.....                                               | 20        |
| Supplemental Table 16. Information of TAA-derived peptides used in the present study.....                                                          | 21        |
| Supplemental Table 17. Side effects of neoantigen based personalized immunotherapy. ....                                                           | 23        |
| <b>SUPPLEMENTARY FIGURES.....</b>                                                                                                                  | <b>24</b> |

|                                                                                                                     |    |
|---------------------------------------------------------------------------------------------------------------------|----|
| Supplemental Figure 1. Proportion of neoantigen-reactive CD8+CD137+T cells in the infusion cells.....               | 24 |
| Supplemental Figure 2. Identification of personalized neoantigen in patient A015 with advanced gastric cancer. .... | 25 |
| Supplemental Figure 3. Antigen specific cytotoxicity of clinical grade neoantigen reactive T cells.....             | 26 |
| Supplemental Figure 4. Correlation between CD137 and intracellular cytokine expression.....                         | 27 |
| Supplemental Figure 5. The memory and activation phenotype analysis of infusion T cells.....                        | 28 |

## **SUPPLEMENTARY METHODS**

### **Flow Cytometry and Antibodies**

FACS Ariar (BD Bioscience) and Accuri™ C6 (BD Bioscience) were used to perform fluorescent expression analysis, the FlowJo software (Treestar, USA) was used for data interpretation. PBMCs, DCs or T Cells were harvested and stained with mouse anti-human antibody labeled by fluorescence for 30 min 4°C in darks as follows: CD3-PerCP-CY5.5(OKT-3,eBioscience) or CD3-FITC(HIT3a, BD Bioscience); CD4-APC(RPA-T4, BD Bioscience) or CD4-PerCP-CY5.5(RPA-T4, BD Bioscience); CD8-PE (HIT8a, BD Bioscience) or CD8-APC (RPA-T8, BD Bioscience) or CD8-PE-CY7(RPA-T8, eBioscience); CD137-PE(4B4-1, BD Bioscience) or CD137-FITC(4B4-1, eBioscience); CD54-PE (HA58, BD Bioscience); CD86-APC(FUN-1, BD Bioscience); HLA-DR-PerCP-CY5.5 (G46-6, BD Bioscience); CD11c-FITC(B-ly6, BD Bioscience); CD45RO-APC(UCHL1, BD Bioscience); CD62L-PE(DREG-56, BD Bioscience) or CD62L-FITC(DREG-56, BD Bioscience); HLA-A2(BB7.2, Medical & Biological Laboratories); CD19-PE(HIB19, BD Bioscience ); CD16-PE(3G8, BD Bioscience ); CD56-APC(B159, BD Bioscience ); CD279-PE(MIH4, BD Bioscience); CD223-PE(T47-530, BD Bioscience); CD366-PE(7D3, BD Bioscience); CD27-PE(M-T271, BD Bioscience); CD28-APC(CD28.2, BD Bioscience); IFN- $\gamma$ -PE(B27, eBioscience); TNF- $\alpha$ -PE(Mab11, eBioscience).

### **Intracellular Cytokine Staining**

In brief, the enriched neoantigen specific T cells ( $1 \times 10^5$ ) were cocultured with corresponding mutant peptide-pulsed irradiated K562-A11 cells ( $2.5 \times 10^4$ ) for 18 hours in 96-well plates. And then, 1 ul/ml GolgiPlug (BD Bioscience) was added to the culture. After 5 hours, cells were stained for CD137 and costained for CD8. Cells were fixed, permeabilized, and stained with antibodies against IFN- $\gamma$  and TNF- $\alpha$ , respectively, using Cytofix/Cytoperm™ and Perm/Wash™ Buffer (BD Bioscience), and subsequently the stained cells were subjected to flow cytometry assay.

## SUPPLEMENTARY TABLES

**Supplemental Table 1.** Overview of identified neoantigens by targeted sequencing guided de novo synthesis model.

| Patient ID  | Somatic mutations <sup>a</sup>                   | Selected mutations by first filtering <sup>b</sup> | Predicted neoantigens <sup>c</sup>         | Selected neoantigens for in vitro identification by second filtering <sup>d</sup> | Immunogenic neoantigen validated in vitro | Tumor regression <sup>e</sup> |
|-------------|--------------------------------------------------|----------------------------------------------------|--------------------------------------------|-----------------------------------------------------------------------------------|-------------------------------------------|-------------------------------|
| <b>A004</b> | n=51, tumor;<br>n=82, cfDNA;                     | n=16                                               | n=25                                       | n=8,                                                                              | 1/8                                       | —                             |
| <b>A008</b> | n=31, tumor;                                     | n=21                                               | n=20 (HLA class I);<br>n=36 (HLA class II) | n=7 (HLA class I)<br>n=2 (HLA class II)                                           | 2/9                                       | —                             |
| <b>A015</b> | n=42, tumor 1;<br>n=49, tumor 2;<br>n=52, cfDNA; | n=22                                               | n=59                                       | n=12                                                                              | 0/12                                      | —                             |
| <b>A017</b> | n=91, tumor;                                     | n=42                                               | n=44                                       | n=3                                                                               | 1/3                                       | CR                            |

<sup>a</sup>As determined by targeted sequencing panel of 416 cancer-related genes. Somatic mutations listed including non-synonymous single nucleotide variants (SNV), and insertions/deletions (indels).

<sup>b</sup>Tumor VAF>2% were selected for patient A008 and A017. For patient A004 and A015, mutations shared in tumor and cfDNA samples were selected, and then VAF > 2% was filtered.

<sup>c</sup>HLA-binding affinities of mutant peptides were predicted by NetMHC 4.0/NetMHCpan 3.0 for HLA class I alleles, and NetMHCII 2.2 for HLA class II alleles. Peptides with an IC50 <500nM or %Rank < 2.0 were predicted to be MHC binders.

<sup>d</sup>The predicted neo-epitopes were ranked, and prioritized the peptides according to the following criteria: i) Strong binders with IC50<50nM or %Rank < 0.5; ii) Mutations with higher tumor VAF; iii) A peptide was predicted to bind two or more HLA molecules; iv) MHC class I binding peptides can also be predicted by NetMHC3.4, and MHC class II binding peptides can also be predicted by IEDB software.

<sup>e</sup>Tumor regression assessment after immunotherapy.

**Supplemental Table 2.** HLA-I and HLA-II alleles in 17 patients with refractory solid tumors

| <i>Patient ID</i> | <i>Age</i> | <i>Sex</i> | <i>Primary<br/>tumor type</i> | <i>HLA class I alleles</i> |                  |                  | <i>HLA class II alleles</i> |                           |
|-------------------|------------|------------|-------------------------------|----------------------------|------------------|------------------|-----------------------------|---------------------------|
| A001              | 34         | M          | Embryonal                     | A*02:07, A*11:01           | B*46:01, B*54:01 | C*01:02, C*01:02 | DRB1* 07:01,<br>DRB1* 08:03 | DQB1*06:01,<br>DQB1*03:03 |
| A002              | 65         | M          | Hepatocellular                | A*01:01, A*24:02           | B*35:01, B*57:01 | C*03:03, C*06:02 | DRB1* 04:04,<br>DRB1* 07:01 | DQB1*03:02,<br>DQB1*03:03 |
| A003              | 61         | M          | Colon                         | A*02:01, A*11:01           | B*35:01, B*40:06 | C*03:03, C*08:01 | DRB1* 08:02,<br>DRB1* 12:01 | DQB1*03:01,<br>DQB1*04:02 |
| A004              | 65         | M          | Gastric                       | A*33:01, A*33:03           | B*14:02, B*15:18 | C*07:04, C*08:02 | DRB1* 01:02,<br>DRB1* 09:01 | DQB1*05:01,<br>DQB1*03:03 |
| A005              | 50         | F          | Endometrium                   | A*11:01, A*24:02           | B*40:01, B*40:02 | C*03:03, C*07:02 | DRB1* 04:05,<br>DRB1* 09:01 | DQB1*03:03,<br>DQB1*04:01 |
| A006              | 40         | M          | Gastric                       | A*02:01, A*30:01           | B*13:02, B*40:06 | C*06:02, C*08:01 | DRB1* 07:01,<br>DRB1* 09:01 | DQB1*02:02,<br>DQB1*03:03 |
| A007              | 63         | M          | Pancreatic                    | A*02:07, A*32:01           | B*46:01, B*52:01 | C*01:02, C*12:02 | DRB1* 09:01,<br>DRB1* 15:02 | DQB1*06:01,<br>DQB1*03:03 |
| A008              | 51         | F          | Pancreatic                    | A*30:01, A*30:01           | B*13:02, B*13:02 | C*06:02, C*06:02 | DRB1* 07:01,<br>DRB1* 07:01 | DQB1*02:02,<br>DQB1*02:02 |
| A009              | 50         | F          | Ovarian                       | A*02:06, A*11:01           | B*15:02, B*58:01 | C*03:02, C*08:01 | DRB1* 03:01,1<br>DRB1* 5:01 | DQB1*06:01,<br>DQB1*02:01 |
| A010              | 24         | M          | Glioma                        | A*02:01, A*29:01           | B*13:02, B*48:01 | C*06:02, C*08:03 | DRB1* 07:01,<br>DRB1* 09:01 | DQB1*02:02,<br>DQB1*03:03 |
| A011              | 66         | M          | Pancreatic                    | A*01:01, A*02:01           | B*40:01, B*57:01 | C*06:02, C*07:02 | DRB1* 08:02,<br>DRB1* 12:02 | DQB1*03:01,<br>DQB1*04:02 |
| A012              | 43         | F          | Hepatocellular                | A*24:02, A*24:02           | B*40:01, B*48:01 | C*07:02, C*08:22 | DRB1* 11:01,<br>DRB1* 15:01 | DQB1*11:01,<br>DQB1*15:01 |
| A013              | 56         | F          | Ovarian                       | A*24:02, A*31:01           | B*40:06, B*46:01 | C*01:02, C*08:01 | DRB1* 09:01,<br>DRB1* 15:01 | DQB1*06:02,<br>DQB1*03:03 |
| A014              | 37         | F          | Gastric                       | A*02:01, A*11:01           | B*40:01, B*40:01 | C*07:02, C*14:02 | DRB1* 08:03,<br>DRB1* 09:01 | DQB1*06:01,<br>DQB1*03:03 |
| A015              | 62         | M          | Gastric                       | A*03:01, A*11:01           | B*44:02, B*55:02 | C*01:02, C*05:01 | DRB1* 04:04,<br>DRB1* 13:01 | DQB1*06:03,<br>DQB1*03:02 |
| A016              | 62         | F          | Pancreatic                    | A*11:01, A*24:02           | B*15:07, B*40:01 | C*03:03, C*03:04 | DRB1* 04:06,<br>DRB1* 15:01 | DQB1*06:02,<br>DQB1*03:02 |
| A017              | 53         | M          | Thymoma                       | A*02:01 A*24:02            | B*35:01 B*40:01  | C*03:03 C*03:04  | DRB1*09:01,<br>DRB1*15:01   | DQB1*03:03,<br>DQB1*06:02 |

**Supplemental Table 3.** Candidate HLA-I and HLA-II alleles binding peptides for patient A008

| <i>Peptide ID</i> | <i>Mutant peptide<sup>a</sup></i> | <i>Protein</i> | <i>Amino acid<br/>change</i> | <i>Allele<br/>frequency</i> | <i>HLA allele</i> | <i>IC50 (nM)<sup>b</sup></i> |
|-------------------|-----------------------------------|----------------|------------------------------|-----------------------------|-------------------|------------------------------|
| TP53-V25G-1       | R <u>G</u> RAMAIYK                | TP53           | V25G                         | 5.34%                       | A*3001            | 2.2                          |
| MTAP-V56I         | KIKNVDC <u>I</u> L                | MTAP           | V56I                         | 26.67%                      | A*3001            | 63.6                         |
| TP53-V25G-2       | GTR <u>G</u> RAMAI                | TP53           | V25G                         | 5.34%                       | A*3001            | 15.7                         |
| BMPR1A-K257N      | KWRGE <u>N</u> VAV                | BMPR1A         | K257N                        | 2.72%                       | A*3001            | 47.2                         |
| SUFU-G11R         | GAP <u>R</u> PTAPPA               | SUFU-          | G11R                         | 7.33%                       | A*3001            | 134.1                        |
| BMPR1A-A357T      | KPT <u>I</u> AHRDLK               | BMPR1A         | A357T                        | 6.92%                       | A*3001            | 101.9                        |
| MEN1-A68P         | LTFQPSP <u>P</u> P                | MEN1           | A68P                         | 5.74%                       | A*3001            | 354.5                        |
| DIS3L2-I777V      | MVMG <u>V</u> LKQAF               | DIS3L2         | I777V                        | 12.09%                      | DRB1*0701         | 18.3                         |
| (15-mers)         | DVLVL                             |                |                              |                             |                   |                              |
| KRAS-G12D         | MTEYKLVVVG                        | KRAS           | G12D                         | 2.44%                       | DRB1*0701         | 121.5                        |
| (15-mers)         | A <u>D</u> GVG                    |                |                              |                             |                   |                              |

<sup>a</sup> Mutant residues are underlined and in bold.

<sup>b</sup> HLA-binding affinities of peptides, as predicted by NetMHC4.0 and NetMHCII 2.2. Peptides with an IC50 < 500nM are predicted to be MHC binders. Peptides with IC50 <50nM are considered as strong binders.

**Supplemental Table 4.** Candidate HLA-A\*0201-binding epitopes for patient A017

| <i>Peptide ID</i> | <i>Mutant peptide<sup>a</sup></i> | <i>Protein</i> | <i>Amino acid<br/>change</i> | <i>Allele<br/>frequency</i> | <i>HLA allele</i> | <i>IC50 (nM)<sup>b</sup></i> | <i>Rank%<sup>c</sup></i> |
|-------------------|-----------------------------------|----------------|------------------------------|-----------------------------|-------------------|------------------------------|--------------------------|
| CDC73-Q254E-1     | NIFAIL <u><b>E</b></u> SV         | CDC73          | Q254E                        | 12.96%                      | A*0201            | 48.1                         | 0.2                      |
| CDC73-Q254E-2     | KNIFAIL <u><b>E</b></u> SV        | CDC73          | Q254E                        | 12.96%                      | A*0201            | 70.2                         | 0.6                      |
| FH-S24L           | A <u><b>L</b></u> APGLGGAAV       | FH             | S24L                         | 14.43%                      | A*0201            | 253.7                        | 1                        |

<sup>a</sup> Mutated residues are underlined and in bold. HLA-binding affinities of peptides, as predicted by NetMHC4.0 <sup>b</sup> and NetMHCpan 3.0 <sup>c</sup>. Peptides with an IC50 < 500nM or Rank% < 2 are predicted to be MHC binders. Peptides with IC50 <50nM or Rank% < 0.5 are considered as strong binders.

**Supplemental Table 5.** HLA-A\*02-restricted irrelevant mutant peptides for patient A017

| <i>Peptide ID</i> | <i>Mutant peptide<sup>a</sup></i> | <i>Protein</i> | <i>Amino acid change</i> | <i>IC50 (nM)<sup>b</sup></i> |
|-------------------|-----------------------------------|----------------|--------------------------|------------------------------|
| KRAS(A02)-G12D    | KLVVVGAG <u><b>D</b></u> GV       | KRAS           | G12D                     | 498                          |
| KRAS(A02)-G13D-1  | VVVGAG <u><b>D</b></u> V          | KRAS           | G13D                     | 495                          |
| KRAS(A02)-G13D-2  | KLVVVGAG <u><b>D</b></u> V        | KRAS           | G13D                     | 506.9                        |
| KRAS(A02)-G12V    | KLVVVGAG <u><b>V</b></u> GV       | KRAS           | G12V                     | 300.2                        |
| KRAS(A02)-G12C    | KLVVVGAG <u><b>C</b></u> GV       | KRAS           | G12C                     | 373.6                        |
| KRAS(A02)-G12R    | KLVVVGAG <u><b>R</b></u> GV       | KRAS           | G12R                     | 506.9                        |
| CTNNB1(A02)-T41A  | GIHSGAT <u><b>A</b></u> TA        | CTNNB1         | T41A                     | 83                           |
| TP53(A02)-R249S   | GMNR <u><b>S</b></u> PILTI        | TP53           | R249S                    | 349                          |
| GNAS(A02)-R201H   | LLRC <u><b>H</b></u> VLTS         | GNAS           | R201H                    | 249                          |

<sup>a</sup> Mutated residues are underlined and in bold. HLA-binding affinities of peptides, as predicted by NetMHC4.0<sup>b</sup>



**Supplemental Table 6.**

Predicted HLA-A\*0201-binding affinity.

| <i>Peptide ID</i> | <i>Sequence</i> | <i>IC50(nM)</i> <sup>a</sup> |
|-------------------|-----------------|------------------------------|
| EBV-LMP2a-356     | FLYALALLL       | 8.25                         |
| KRAS-A11-G12C     | VVGACGVGK       | 29376.91                     |
| CDC73-MT          | NIFAILESV       | 48                           |
| CDC73-WT          | NIFAILQSV       | 36.86                        |

<sup>a</sup>HLA-binding affinities of peptides, as predicted by NetMHC4.0.

Peptides with an IC50 &lt; 500nM are predicted to be MHC binders.

Peptides with IC50 &lt;50nM are considered as strong binders.

**Supplemental Table 7.** Candidate HLA-binding peptides for patient A004

| <i>Peptide ID</i> | <i>Mutant peptide<sup>a</sup></i> | <i>Protein</i> | <i>AA change</i>                         | <i>Allele frequency<sup>b</sup></i> | <i>HLA binding affinity (Rank%)<sup>c</sup></i> |
|-------------------|-----------------------------------|----------------|------------------------------------------|-------------------------------------|-------------------------------------------------|
| PMS2-L236F-1      | FGQKQ <b><u>F</u></b> QSL         | PMS2           | L236F                                    | 11.06%                              | B*1402(0.4); C*0704(0.8);<br>C*0802(2)          |
| CDA-A88T          | RAIAI <b><u>T</u></b> SDM         | CDA            | A88T                                     | 20.31%                              | B*1518(0.7); C*0802(0.7)                        |
| SUFU-G11R         | ELRPSGAP <b><u>R</u></b>          | SUFU           | G11R                                     | 16.32%                              | A*3301(0.18); A*3303(0.15)                      |
| PMS2-L236F-2      | KQ <b><u>F</u></b> QSLIPF         | PMS2           | L236F                                    | 11.06%                              | B*1402(1.5); B*1518(0.06)                       |
| CYP2A6-V80M-1     | HLGPRRV <b><u>V</u></b> M         | CYP2A6         | V80M                                     | 2.17%                               | B*1402(0.4); C*0704(0.7)                        |
| CYP2A6-V80M-2     | <b><u>M</u></b> LCGHDAVR          | CYP2A6         | V80M                                     | 2.17%                               | A*3301(0.8); A*3303(0.6)                        |
| CYP2A6-N438Y      | KR <b><u>Y</u></b> CFGEGL         | CYP2A6         | N438Y                                    | 13.33%                              | B*1402(1.1); C*0704(0.7)                        |
| TP53-S96fs        | <b><u>SRKPTRAATV</u></b>          | TP53           | S96fs<br>(c.285_297delTTC<br>TGTCCCTTCC) | 32.93%                              | C*0704(0.8)                                     |

<sup>a</sup>Mutated residues are underlined and in bold. <sup>b</sup>Listed are variant allele frequency (AF) in tumor sample.

<sup>c</sup>HLA-binding affinities of peptides are predicted by NetMHCpan 3.0. Peptides with Rank% < 2 are predicted to be MHC binders. Peptides with Rank% < 0.5 are considered as strong binders.

**Supplemental Table 8.** Candidate HLA-binding peptides for patient A015

| <i>Peptide ID</i>     | <i>Mutant peptide<sup>a</sup></i> | <i>Protein</i> | <i>AA change</i>                                  | <i>Allele frequency<sup>b</sup></i> | <i>HLA binding affinity (Rank%)<sup>c</sup></i> |
|-----------------------|-----------------------------------|----------------|---------------------------------------------------|-------------------------------------|-------------------------------------------------|
| PDE11A-921insS-1      | SS <u>SS</u> PASVM                | PDE11A         | 921insS (c.2761_2763insTCC)                       | 82.35%                              | C*0102(0.4); C*0501(0.3)                        |
| TUBB2A-A185T          | VVEPYN <u>T</u> TL                | TUBB2A         | A185T                                             | 27.14%                              | C*0102(0.04); C*0501(0.25)                      |
| CYP2D6-G322S          | FGDIVPL <u>S</u> V                | CYP2D6         | G322S                                             | 7.30%                               | C*0102(1); C*0501(0.08)                         |
| SDHA-I579V            | T <u>V</u> YGAEARK                | SDHA           | I579V                                             | 1.51%                               | A*0301(0.5); A*1101(0.4)                        |
| TUBB2A-A185T          | EPYN <u>T</u> TL SV               | TUBB2A         | A185T                                             | 27.14%                              | B*5502(0.25)                                    |
| ATM-E2351A            | AETCL <u>A</u> NPA                | ATM            | E2351A                                            | 5.53%                               | B*4402(0.4)                                     |
| CYP2D6-G322S-2        | IVPL <u>S</u> VTHM                | CYP2D6         | G322S                                             | 7.30%                               | C*0102(0.4)                                     |
| CYP2D6-G322S-3        | VPL <u>S</u> VTHMT                | CYP2D6         | G322S                                             | 7.30%                               | B*5502(0.3)                                     |
| CYP2D6-V319I          | FGDI <u>I</u> PLGV                | CYP2D6         | V319I                                             | 6.46%                               | C*0501(0.125)                                   |
| SDHA-Y606H            | RIDEYD <u>H</u> SK                | SDHA           | Y606H                                             | 4.09%                               | A*1101(0.9)                                     |
| PDE11A-921insS-2      | <u>S</u> SPASVMVAK                | PDE11A         | 921insS (c.2761_2763insTCC)                       | 82.35%                              | A*0301(0.5); A*1101(0.03)                       |
| ATM-NPAVIM2353delinsK | AETCLE <u>K</u> QTY               | ATM            | NPAVIM2353delinsK (c.7056_7070delTCCTGCGGTCATCAT) | 5.14%                               | B*4402(0.05)                                    |

<sup>a</sup> Mutated residues are underlined and in bold. <sup>b</sup> Listed are variant allele frequency (AF) in tumor sample.

<sup>c</sup> HLA-binding affinities of peptides are predicted by NetMHCpan 3.0. Peptides with Rank% < 2 are predicted to be MHC binders. Peptides with Rank% < 0.5 are considered as strong binders.

**Supplemental Table 9.** High-frequency mutant genes in common solid tumors (COSMIC)

| Tumor types                        |               | Alteration frequency of mutated gene |               |              |              |
|------------------------------------|---------------|--------------------------------------|---------------|--------------|--------------|
| Stomach Adenocarcinoma             | TP53 (26 %)   | ARID1A (11 %)                        | FAT4 (16 %)   | KMT2C (10 %) | LRP1B (16 %) |
|                                    | PIK3CA (9 %)  | PREX2 (10 %)                         |               |              |              |
| Pancreas carcinoma                 | KRAS (56 %)   | CDKN2A (11 %)                        | SMAD4 (12 %)  | TP53 (33 %)  | GNAS (15%)   |
| Oesophagus Squamous cell carcinoma | TP53 (57 %)   | CDKN2A (13 %)                        | FAT1 (15 %)   | KMT2D (19 %) | LRP1B (12 %) |
|                                    | NFE2L2 (11 %) | NOTCH1 (18 %)                        | PIK3CA (9 %)  |              |              |
| Ovary Carcinoma                    | TP53 (47 %)   | PIK3CA (11 %)                        | KRAS (9%)     |              |              |
| Liver Hepatocellular carcinoma     | TP53 (27 %)   | TERT (25 %)                          | CTNNB1 (19 %) |              |              |
| Lung Adenocarcinoma                | EGFR (36 %)   | TP53 (30 %)                          | KRAS (17 %)   |              |              |
| Lung Squamous cell carcinoma       | TP53 (44 %)   | LRP1B (16 %)                         |               |              |              |
| Large intestine adenocarcinoma     | APC (46 %)    | BRAF (11 %)                          | FAT4 (15 %)   | KMT2C (11 %) | KRAS (34 %)  |
|                                    | LRP1B (13 %)  | PIK3CA (13 %)                        | SMAD4 (10 %)  | TP53 (44 %)  |              |
| Cervix Squamous cell carcinoma     | PIK3CA (18 %) |                                      |               |              |              |

**Supplemental Table 10.** Alteration frequency of 21 mutant genes in nine common solid tumors (TCGA)

| <i>GENE</i>   | <i>Cervical</i><br>(TCGA) | <i>Colorectal</i><br>(TCGA) | <i>ESCC</i><br>(UCLA<br>2014) | <i>Liver</i><br>(TCGA) | <i>Lung adeno</i><br>(TCGA) | <i>Lung squ</i><br>(TCGA) | <i>Ovarian</i><br>(TCGA) | <i>Pancreas</i><br>(QCMG<br>2016) | <i>Stomach</i><br>(TCGA) |
|---------------|---------------------------|-----------------------------|-------------------------------|------------------------|-----------------------------|---------------------------|--------------------------|-----------------------------------|--------------------------|
| <b>TP53</b>   | 4.60%                     | 53.80%                      | 60.60%                        | 30.80%                 | 46.10%                      | 72.30%                    | 87.00%                   | 66.10%                            | 48.10%                   |
| <b>KRAS</b>   | 5.70%                     | 43.00%                      | 0.00%                         | 1.60%                  | 32.60%                      | 1.10%                     | 0.60%                    | 89.80%                            | 9.40%                    |
| <b>LRP1B</b>  | 6.70%                     | 17.90%                      | 10.90%                        | 8.80%                  | 29.60%                      | 39.00%                    | 4.10%                    | 5.70%                             | 26.30%                   |
| <b>KMT2D</b>  | 11.30%                    | 5.80%                       | 18.20%                        | 5.60%                  | 8.30%                       | 18.60%                    | 0.30%                    | 5%                                | 17.50%                   |
| <b>APC</b>    | 3.60%                     | 71.70%                      | 2.20%                         | 3.20%                  | 3.90%                       | 4.50%                     | 2.20%                    | 1.30%                             | 12.40%                   |
| <b>KMT2C</b>  | 14.90%                    | 5.40%                       | 8%                            | 5.40%                  | 18.30%                      | 16.40%                    | 2.20%                    | 5.50%                             | 13.90%                   |
| <b>PIK3CA</b> | 27.30%                    | 14.80%                      | 8%                            | 3.50%                  | 6.50%                       | 15.30%                    | 0.60%                    | 1.60%                             | 16.50%                   |
| <b>FAT4</b>   | 5.20%                     | 17.50%                      | 0%                            | 5.10%                  | 14.80%                      | 14.70%                    | 0.90%                    | 2.90%                             | 21.50%                   |
| <b>ARID1A</b> | 7.70%                     | 9.40%                       | 1.50%                         | 8.60%                  | 7%                          | 5.10%                     | 0.90%                    | 7.60%                             | 25.80%                   |
| <b>FAT1</b>   | 5.20%                     | 5.80%                       | 11.70%                        | 2.40%                  | 10.90%                      | 11.90%                    | 3.50%                    | 1.80%                             | 8.60%                    |
| <b>CDKN2A</b> | 1.50%                     | 0%                          | 2.90%                         | 2.70%                  | 3.90%                       | 11.90%                    | 0%                       | 18.50%                            | 4.30%                    |
| <b>SMAD4</b>  | 3.60%                     | 11.70%                      | 0%                            | 1.10%                  | 3.50%                       | 2.80%                     | 0%                       | 22.50%                            | 7.10%                    |
| <b>PREX2</b>  | 1.50%                     | 4.90%                       | 0%                            | 5.10%                  | 3.90%                       | 12.40%                    | 0.60%                    | 1.80%                             | 12.70%                   |
| <b>CTNNB1</b> | 2.10%                     | 4.90%                       | 0%                            | 26%                    | 3.90%                       | 2.30%                     | 0.60%                    | 0.80%                             | 6.60%                    |
| <b>NOTCH1</b> | 5.70%                     | 0%                          | 8%                            | 1.90%                  | 4.30%                       | 7.30%                     | 1.30%                    | 0.50%                             | 7.10%                    |
| <b>NFE2L2</b> | 6.20%                     | 0.90%                       | 5.80%                         | 3.50%                  | 1.70%                       | 14.70%                    | 0%                       | 0%                                | 0.50%                    |
| <b>EGFR</b>   | 2.10%                     | 4.50%                       | 0.70%                         | 1.60%                  | 14.30%                      | 3.40%                     | 2.20%                    | 0%                                | 4.80%                    |
| <b>BRAF</b>   | 1%                        | 9.90%                       | 1.50%                         | 0%                     | 9.60%                       | 4.50%                     | 0.60%                    | 0.50%                             | 4.60%                    |
| <b>GNAS</b>   | 1.50%                     | 2.70%                       | 0.00%                         | 1.60%                  | 3.00%                       | 1.70%                     | 0.90%                    | 2.60%                             | 5.30%                    |
| <b>TERT</b>   | 0.50%                     | 0.40%                       | 0%                            | 0.50%                  | 0.40%                       | 1.70%                     | 0.30%                    | 0.50%                             | 2.80%                    |
| <b>MDM2</b>   | 0.50%                     | 0.90%                       | 0%                            | 0.30%                  | 0.90%                       | 1.10%                     | 0%                       | 0.30%                             | 1.80%                    |

**Supplemental Table 11.** Alteration frequency of hotspot mutations in common solid tumors (COSMIC)

| Tumor types               | Alteration frequency of mutated genes and hotspot mutations |             |               |             |            |       |
|---------------------------|-------------------------------------------------------------|-------------|---------------|-------------|------------|-------|
| Stomach<br>Adenocarcinoma | TP53 (26%)                                                  |             | PIK3CA (9%)   |             |            |       |
|                           | AA change                                                   | MF          | AA change     | MF          |            |       |
|                           | R175H                                                       | 1.72%       | E542K         | 1.22%       |            |       |
|                           | R248Q                                                       | 1.12%       | E545K         | 1.27%       |            |       |
|                           | R248W                                                       | 0.80%       | H1047R        | 2.54%       |            |       |
|                           | R249S                                                       | 0.16%       |               |             |            |       |
|                           | R273C                                                       | 0.08%       |               |             |            |       |
|                           | R273H                                                       | 0.59%       |               |             |            |       |
|                           | R282W                                                       | 0.80%       |               |             |            |       |
|                           | Y163C                                                       | 0.16%       |               |             |            |       |
|                           | Y220C                                                       | 0.16%       |               |             |            |       |
|                           | G245S                                                       | 1.13%       |               |             |            |       |
| Pancreas Tumor            | KRAS (56%)                                                  |             | TP53 (33%)    |             | GNAS (15%) |       |
|                           | AA change                                                   | MF          | AA change     | MF          | AA change  | MF    |
|                           | G12A                                                        | 0.77%       | R249S         | 0.11%       | R201H      | 4.62% |
|                           | G12C                                                        | 1.49%       | R175H         | 0.98%       | R201C      | 5.91% |
|                           | G12D                                                        | 26.55%      | R248Q         | 0.95%       |            |       |
|                           | G12R                                                        | 6.97%       | R248W         | 0.80%       |            |       |
|                           | G12S                                                        | 0.90%       | R273C         | 0.91%       |            |       |
|                           | G12V                                                        | 16.97%      | R273H         | 1.64%       |            |       |
|                           | G13D                                                        | 0.79%       | R282W         | 1.35%       |            |       |
|                           | Q61H                                                        | 0.79%       | V157F         | 0.22%       |            |       |
|                           |                                                             |             | Y163C         | 0.29%       |            |       |
|                           |                                                             |             | Y220C         | 0.51%       |            |       |
|                           |                                                             |             | G245S         | 0.54%       |            |       |
|                           | Oesophagus Squamous<br>cell carcinoma                       | TP53 (57 %) |               | PIK3CA (9%) |            |       |
| AA change                 |                                                             | MF          | AA change     | MF          |            |       |
| R175H                     |                                                             | 0.00%       | E542K         | 1.15%       |            |       |
| R248Q                     |                                                             | 0.00%       | E545K         | 2.17%       |            |       |
| R248W                     |                                                             | 0.97%       | H1047R        | 1.02%       |            |       |
| R249S                     |                                                             | 0.25%       |               |             |            |       |
| R273C                     |                                                             | 0.64%       |               |             |            |       |
| R273H                     |                                                             | 0.97%       |               |             |            |       |
| R282W                     |                                                             | 1.82%       |               |             |            |       |
| Y163C                     |                                                             | 0.32%       |               |             |            |       |
| Y220C                     |                                                             | 1.25%       |               |             |            |       |
| G245S                     |                                                             | 0.52%       |               |             |            |       |
| Ovary Carcinoma           | TP53 (47 %)                                                 |             | PIK3CA (11 %) |             | KRAS (9%)  |       |
|                           | AA change                                                   | MF          | AA change     | MF          | AA change  | MF    |
|                           | R175H                                                       | 0.00%       | E542K         | 1.22%       | G12A       | 0.61% |

|                                       |                      |           |       |                     |           |                     |           |
|---------------------------------------|----------------------|-----------|-------|---------------------|-----------|---------------------|-----------|
|                                       |                      | R248Q     | 0.00% | E545K               | 1.48%     | G12C                | 0.28%     |
|                                       |                      | R248W     | 1.05% | H1047R              | 4.01%     | G12D                | 3.34%     |
|                                       |                      | R249S     | 0.20% |                     |           | G12R                | 0.45%     |
|                                       |                      | R273C     | 1.22% |                     |           | G12S                | 0.14%     |
|                                       |                      | R273H     | 1.90% |                     |           | G12V                | 3.05%     |
|                                       |                      | R282W     | 0.56% |                     |           | G13D                | 0.56%     |
|                                       |                      | Y163C     | 0.49% |                     |           | Q61H                | 0.16%     |
|                                       |                      | Y220C     | 1.61% |                     |           |                     |           |
|                                       |                      | G245S     | 0.86% |                     |           |                     |           |
| <b>Liver Hepatocellular carcinoma</b> | <b>TP53 (27%)</b>    |           |       | <b>CTNNB1 (19%)</b> |           |                     |           |
|                                       | <b>AA change</b>     | <b>MF</b> |       | <b>AA change</b>    | <b>MF</b> |                     |           |
|                                       |                      | R248W     | 0.10% | S45P                | 1.77%     |                     |           |
|                                       |                      | R249S     | 7.65% | T41A                | 2.26%     |                     |           |
|                                       |                      | R273C     | 0.42% |                     |           |                     |           |
|                                       |                      | R273H     | 0.12% |                     |           |                     |           |
|                                       |                      | R282W     | 0.15% |                     |           |                     |           |
|                                       |                      | Y163C     | 0.07% |                     |           |                     |           |
|                                       |                      | Y220C     | 0.25% |                     |           |                     |           |
|                                       |                      | G245S     | 0.07% |                     |           |                     |           |
| <b>Lung Adenocarcinoma</b>            | <b>EGFR (36 %)</b>   |           |       | <b>TP53 (30%)</b>   |           | <b>KRAS (17 %)</b>  |           |
|                                       | <b>AA change</b>     | <b>MF</b> |       | <b>AA change</b>    | <b>MF</b> | <b>AA change</b>    | <b>MF</b> |
|                                       |                      | T790M     | 2.55% | Y163C               | 0.27%     | G12A                | 1.47%     |
|                                       |                      | L858R     | 9.65% | Y220C               | 0.31%     | G12C                | 5.93%     |
|                                       |                      |           |       | R248W               | 0.36%     | G12D                | 3.30%     |
|                                       |                      |           |       | R249S               | 0.44%     | G12R                | 0.24%     |
|                                       |                      |           |       | R273C               | 0.09%     | G12S                | 0.50%     |
|                                       |                      |           |       | R273H               | 0.85%     | G12V                | 4.06%     |
|                                       |                      |           |       | R282W               | 0.31%     | G13D                | 0.49%     |
|                                       |                      |           |       | G245S               | 0.18%     | Q61H                | 0.22%     |
|                                       |                      |           |       |                     |           |                     |           |
|                                       |                      |           |       |                     |           |                     |           |
|                                       |                      |           |       |                     |           |                     |           |
| <b>Lung Squamous cell carcinoma</b>   | <b>TP53 ( 44 % )</b> |           |       |                     |           |                     |           |
|                                       | <b>AA change</b>     | <b>MF</b> |       |                     |           |                     |           |
|                                       |                      | R248W     | 0.77% |                     |           |                     |           |
|                                       |                      | R249S     | 0.70% |                     |           |                     |           |
|                                       |                      | R273C     | 0.35% |                     |           |                     |           |
|                                       |                      | R273H     | 0.98% |                     |           |                     |           |
|                                       |                      | R282W     | 0.49% |                     |           |                     |           |
|                                       |                      | Y163C     | 0.63% |                     |           |                     |           |
|                                       |                      | Y220C     | 0.56% |                     |           |                     |           |
|                                       |                      | G245S     | 0.07% |                     |           |                     |           |
| <b>Large intestine adenocarcinoma</b> | <b>TP53 (44 %)</b>   |           |       | <b>KRAS (34%)</b>   |           | <b>PIK3CA (13%)</b> |           |
|                                       | <b>AA change</b>     | <b>MF</b> |       | <b>AA change</b>    | <b>MF</b> | <b>AA change</b>    | <b>MF</b> |
|                                       |                      | R248W     | 2.27% | G12A                | 2.03%     | E542K               | 2.27%     |

|                                       |                     |           |      |        |        |       |
|---------------------------------------|---------------------|-----------|------|--------|--------|-------|
|                                       | R249S               | 0.04%     | G12C | 2.66%  | E545K  | 3.50% |
|                                       | R273C               | 2.00%     | G12D | 11.75% | H1047R | 2.53% |
|                                       | R273H               | 2.34%     | G12R | 0.41%  |        |       |
|                                       | R282W               | 2.31%     | G12S | 1.93%  |        |       |
|                                       | Y163C               | 0.16%     | G12V | 7.40%  |        |       |
|                                       | Y220C               | 0.33%     | G13D | 6.42%  |        |       |
|                                       | G245S               | 1.68%     | Q61H | 0.22%  |        |       |
|                                       | <b>BRAF (11%)</b>   |           |      |        |        |       |
|                                       | <b>AA change</b>    | <b>MF</b> |      |        |        |       |
|                                       | V600E               | 10.59%    |      |        |        |       |
| <b>Cervix Squamous cell carcinoma</b> | <b>PIK3CA (18%)</b> |           |      |        |        |       |
|                                       | <b>AA change</b>    | <b>MF</b> |      |        |        |       |
|                                       | E542K               | 4.24%     |      |        |        |       |
|                                       | E545K               | 8.92%     |      |        |        |       |
|                                       | H1047R              | 0.45%     |      |        |        |       |

MF: mutational frequency; AA change: amino acid changes.



**Supplemental Table 12.** Peptides eliciting IFN- $\gamma$  release from PBMC measured by ELISPOT and CBA using shared neoantigen peptide library

| Patient ID | Tumor type  | Missense mutation       | HLA alleles | Epitope peptides <sup>a</sup>               | ELISPOT <sup>b</sup><br>peptide/control<br>(fold change) | CBA <sup>b</sup><br>peptide/control (fold change) | Results <sup>c</sup> |
|------------|-------------|-------------------------|-------------|---------------------------------------------|----------------------------------------------------------|---------------------------------------------------|----------------------|
| A020       | Pancreatic  | KRAS G12D               | A*1101      | VVGAD <u>D</u> GVGK                         | 178/65 (2.74)                                            | NA                                                | +                    |
| A005       | Endometrial | KRAS G12C               | A*1101      | VVGAC <u>C</u> GVGK                         | 172/42 (4.1)                                             | NA                                                | +                    |
| A011       | Pancreatic  | KRAS G12V               | A*0201      | KLVVVGA <u>V</u> GV                         | NA                                                       | 129.82/39.09 (3.32)                               | +                    |
| A007       | Pancreatic  | KRAS G12V               | A*0201      | KLVVVGA <u>V</u> GV                         | NA                                                       | 152.62/186.79 (0.84)                              | -                    |
| A018       | Lung        | KRAS G12A               | A*1101      | VVGAA <u>A</u> GVGK                         | NA                                                       | 57.3/8.16 (7.02)                                  | +                    |
| A019       | Lung        | TP53 G245S              | A*1101      | SSCMG <u>S</u> MNR                          | NA                                                       | 623.31/601.75 (1.04)                              | -                    |
| A021       | Gastric     | TP53 R248W              | A*0201      | GMN <u>Q</u> RPILTI                         | 0/0                                                      | NA                                                | -                    |
| B001       | Pancreatic  | KRAS G12V               | A*1101      | VVGAV <u>V</u> GVGK                         | 39/36 (1.1)                                              | NA                                                | -                    |
| B002       | Pancreatic  | KRAS G12V               | A*0201      | KLVVVGA <u>V</u> GV                         | 19/21 (0.9)                                              | 5.81/10.63 (0.55)                                 | -                    |
| B003       | Pancreatic  | KRAS G12D               | A*0201      | KLVVVGA <u>D</u> GV                         | 0/0                                                      | 6.27/8.80 (0.71)                                  | -                    |
| C001       | Gastric     | BRAF V600E <sup>d</sup> | DRB1*1101   | EDLTVKIGDFGLATE <u>E</u> K<br>SRWSGSHQFEQLS | NA                                                       | 264.31/245.55 (1.08)                              | -                    |
| C002       | Pancreatic  | KRAS G12V               | A*1101      | VVGAV <u>V</u> GVGK                         | NA                                                       | 90.23/20.68 (4.36)                                | +                    |
| C003       | Pancreatic  | KRAS G12D               | A*0201      | KLVVVGA <u>D</u> GV                         | NA                                                       | 1272.56/390.35 (3.26)                             | +                    |

<sup>a</sup>Mutated residues are underlined and in bold. <sup>b</sup> The secretion of IFN- $\gamma$  was measured by ELISPOT (spots/10<sup>5</sup> cells) and Cytometric Bead Array (CBA, pg/ml) to identify immunogenic neoantigen. Values indicate the number of spots per 10<sup>5</sup>PBMCs reactive with the corresponding peptides (left value) and negative control (right value) in IFN- $\gamma$  ELISPOT. <sup>c</sup> “+” represent IFN- $\gamma$  levels greater than twice the negative control, which was considered positive T cell reactivity. In contrast, “-” represent a negative T cell reactivity. NA, not assessed.

<sup>d</sup>The HLA-DRB1\*1101 restricted long peptide of mutant BRAF-V600E, which had been identified as immunogenic peptide, was also stored in our inventory peptide library.

**Supplemental Table 13.** Phenotypic characteristics of the adoptive transfer cells (bulk T cells and DCs)

|                                    | Phenotype     | Markers of monitoring | Patient ID |       |       |       |       |       |
|------------------------------------|---------------|-----------------------|------------|-------|-------|-------|-------|-------|
|                                    |               |                       | A005       | A011  | A017  | A020  | C002  | C003  |
| <b>Composition of bulk T cells</b> | CD8+T Cells   | CD3+CD8+              | 60.3%      | 43.4% | 67.2% | 36.7% | 30.1% | 25.0% |
|                                    | CD4+T Cells   | CD3+CD4+              | 36.3%      | 42.6% | 25.2% | 60.6% | 47.6% | 53.8% |
|                                    | B Cells       | CD3-CD19+             | 0.5%       | 0.7%  | 0.3%  | 0.2%  | 2.5%  | 7.80% |
|                                    | NK Cells      | CD56+CD16+            | 3.1%       | 13.8% | 10.6% | 1.5%  | 6.8%  | 10.5% |
|                                    | NKT Cells     | CD3+CD56+CD16+        | 0.3%       | 3.8%  | 1.1%  | 0.0%  | 0.4%  | 1.2%  |
| <b>Costimulatory molecules on</b>  |               |                       |            |       |       |       |       |       |
| <b>T cells<sup>a</sup></b>         | PD-1 (CD279)  | CD8+CD279+            | 23.8%      | 4.2%  | 2.1%  | 1.4%  | 1.6%  | 2.3%  |
|                                    |               | CD4+CD279+            | 15.4%      | 1.1%  | 0.6%  | 0.6%  | 4.5%  | 3.9%  |
|                                    | LAG-3 (CD223) | CD8+CD223+            | 67.3%      | 49.0% | 75.5% | 58.9% | 72.6% | 54.8% |
|                                    |               | CD4+CD223+            | 43.3%      | 11.8% | 44.7% | 13.2% | 29.6% | 28.2% |
|                                    | TIM-3 (CD366) | CD8+CD366+            | 58.9%      | 78.5% | 64.6% | 89.2% | 78.9% | 34.9% |
|                                    |               | CD4+CD366+            | 28.8%      | 14.5% | 19.7% | 49.5% | 48.5% | 10.7% |
|                                    | CD27          | CD8+CD27+             | 59.4%      | 20.4% | 58.0% | 95.6% | 49.0% | 57.4% |
|                                    |               | CD4+CD27+             | 38.6%      | 51.2% | 49.2% | 80.7% | 31.1% | 35.9% |
|                                    | CD28          | CD8+CD28+             | 49.0%      | 22.5% | 72.3% | 81.2% | 45.6% | 73.8% |
|                                    |               | CD4+CD28+             | 75.7%      | 66.6% | 79.2% | 98.2% | 82.0% | 75.7% |
|                                    | CD11C+        | CD11C+                | 81.1%      | 81.7% | 93.7% | 97.8% | 90.8% | 83.7% |
|                                    | HLA-DR+       | CD11C+HLA-DR+         | 99.5%      | 98.2% | 99.7% | 61.1% | 99.7% | 93.9% |
| <b>DC maturity</b>                 | CD86+         | CD11C+CD86+           | 97.7%      | 78.4% | 98.3% | 12.8% | 80.9% | 88.6% |
|                                    | CD54+         | CD11C+CD54+           | 97.5%      | 99.7% | 99.5% | 99.6% | 99.9% | 99.3% |

<sup>a</sup>gated on CD3. The represent data are depicted.

**Supplemental Table 14.** Clinical characteristics of 6 patients receiving personalized immunotherapy

| Patient ID | Age | sex | Primary tumor | Pathology            | Grade | TNM (Stage)        | Metastatic Sites                                             | Prior Therapy                                                            | PS <sup>a</sup> |
|------------|-----|-----|---------------|----------------------|-------|--------------------|--------------------------------------------------------------|--------------------------------------------------------------------------|-----------------|
| A020       | 51  | F   | Pancreas      | Adenocarcinoma       | G2    | T2N0M1 (IV)        | Liver, Para-aortic lymph nodes                               | Surgery, S-1, Gemcitabine+S-1                                            | 1               |
| C002       | 69  | M   | Pancreas      | Adenocarcinoma       | G3    | T4N0 M0 (III, R2)  | Local advanced                                               | Surgery                                                                  | 1               |
| C003       | 35  | F   | Pancreas      | Adenocarcinoma       | G3    | T1N2 M1 (IV)       | Lung, retroperitoneal and mediastinal metastatic lymph nodes | NO                                                                       | 2               |
| A005       | 50  | F   | Endometrium   | Clear cell carcinoma | G3    | T4 N1 M1 (IV)      | Left clavicle lymph nodes, Lung, Liver                       | Surgery, Albumin paclitaxel + paraplatin, Albumin paclitaxel             | 1               |
| A017       | 52  | M   | Thymus        | Adenocarcinoma       | G2    | T4 N0 M1 (IV)      | Lung                                                         | Surgery, 3-dimensional conformal radiotherapy, Docetaxel +cisplatin, S-1 | 0               |
| A011       | 66  | M   | Pancreas      | Adenocarcinoma       | G2-3  | T2 N1 M0 (IIb, R1) | Resection margin positive                                    | Surgery                                                                  | 0               |

<sup>a</sup> PS: Performance status: ECOG, Eastern Cooperative Oncology Group.

**Supplemental Table 15.** Treatment scheme and clinical responses after personalized immunotherapy

| Patient ID | Preconditioning Regimens |                           | Treatment | Total No. of Infusion Cells |                           | PFS (days)       | iRR | PS <sup>c</sup> after 2 cycles of treatment |
|------------|--------------------------|---------------------------|-----------|-----------------------------|---------------------------|------------------|-----|---------------------------------------------|
|            | Chemotherapy             | Radiotherapy <sup>b</sup> | Cycles    | DCs ( $\times 10^7$ )       | CTLs ( $\times 10^{10}$ ) |                  |     |                                             |
| A020       | Gem+Abraxane+CTX         | 0.5Gy bid*2d              | 10        | 21.378                      | 11.968                    | 289              | SD  | 0                                           |
| C002       | Gem+CTX                  | 60Gy/15f                  | 5         | 14.36                       | 5.372                     | 146              | SD  | 0                                           |
| C003       | Gem+CTX                  | 0.5Gy bid*2d              | 4         | 7.88                        | 2.356                     | 159              | PR  | 0                                           |
| A005       | Gem+CTX                  | 40Gy/20f                  | 3         | 8.75                        | 2.124                     | 229              | SD  | 0                                           |
| A017       | Gem+CTX                  | —                         | 5         | 14.86                       | 3.612                     | 895 <sup>a</sup> | CR  | 0                                           |
| A011       | Gem+CTX                  | 55Gy/25f                  | 2         | 4.64                        | 1.924                     | 454              | ND  | 0                                           |

<sup>a</sup> (The last follow up: Oct. 15, 2018).

<sup>b</sup> The patients with locally advanced unresectable solid tumor received stereotactic body radiotherapy (SBRT) with a total dose of 40–60 Gy during the first immunotherapy cycle. For patients with metastases, partial lesions received a low-dose radiation (0.5 Gy bid for 2 days) before the infusion of NRTs in each immunotherapy cycle.

<sup>c</sup> PS: Performance status: ECOG, Eastern Cooperative Oncology Group.

Gem, Gemcitabine; CTX, Cyclophosphamid; iRR, immune-related response, according to irRECIST1.1.

**Supplemental Table 16.** Information of TAA-derived peptides used in the present study.

| Peptide name  | Original protein | Position of peptide | Amino acid sequence  | HLA type | References |
|---------------|------------------|---------------------|----------------------|----------|------------|
| CEA571        | CEA              | 571-579             | YLSGANLNL            | HLA-A2   | [1]        |
| CEA-691-H5    | CEA              | 691-699             | IMIGHLVGV            | HLA-A2   | [2]        |
| VEGFR2-773    | VEGFR2           | 773-781             | VIAMFFWL             | HLA-A2   | [3]        |
| Sur1M2-96     | Survivin         | 96-104              | LMLGEFLKL            | HLA-A2   | [4]        |
| HER2-369 v2v9 | Her2/neu         | 369-377             | KVFGSLAFV            | HLA-A2   | [5, 6]     |
| HER2-444      | Her2/neu         | 444-453             | TLQGLGISWL           | HLA-A2   | [7]        |
| HER2-689      | Her2/neu         | 689-697             | RLLQETELV            | HLA-A2   | [8]        |
| HER2-776      | Her2/neu         | 776-790             | GVGSPYVSRLLGICL      | HLA-A2   | [9, 10]    |
| WT p53M2-149  | p53              | 149-157             | SMPPPGRTRV           | HLA-A2   | [11]       |
| WT p53-264    | p53              | 264-272             | LLGRNSFEV            | HLA-A2   | [12]       |
| MUC1-12       | MUC1             | 12-20               | LLLLTVLTV            | HLA-A2   | [13]       |
| CA125-13272   | MUC16, CA125     | 13272-13281         | YTLDRDSLIV           | HLA-A2   | [14]       |
| AGR2-11       | AGR2             | 11-19               | LLVALSYTL            | HLA-A2   | [15]       |
| AGR2-127      | AGR2             | 127-135             | RIMFVDPSL            | HLA-A2   | [15]       |
| EGFR-479      | EGFR             | 479-488             | KLFGTSGQKT           | HLA-A2   | [16]       |
| hTERT-540     | TERT             | 540-548             | ILAKFLHWL            | HLA-A2   | [9, 17]    |
| SART3-302     | SART3            | 302-310             | LLQAEAPRL            | HLA-A2   | [18]       |
| SART3-309     | SART3            | 309-317             | RLAEYQAYI            | HLA-A2   | [19]       |
| WT1-126       | WT1              | 126-134             | RMFPNAPYL            | HLA-A2   | [20]       |
| NY-ESO1-161   | NY-ESO-1         | 161-180             | WITQCFLPVFLAQPPSGQRR | HLA-A2   | [21]       |
| NY-ESO1-157   | NY-ESO-1         | 157-165             | SLLMWITQV            | HLA-A2   | [9]        |

TAA: tumor associated antigens.

- [1] Fauquembergue E, Toutirais O, Tougeron D, Drouet A, Le Gallo M, Desille M, et al. HLA-A\*0201-restricted CEA-derived peptide CAP1 is not a suitable target for T-cell-based immunotherapy. *J Immunother*. 2010;33:402-13.
- [2] Parkhurst MR, Joo J, Riley JP, Yu Z, Li Y, Robbins PF, et al. Characterization of genetically modified T-cell receptors that recognize the CEA:691-699 peptide in the context of HLA-A2.1 on human colorectal cancer cells. *Clinical cancer research : an official journal of the American Association for Cancer Research*. 2009;15:169-80.
- [3] Wada S, Tsunoda T, Baba T, Primus FJ, Kuwano H, Shibuya M, et al. Rationale for antiangiogenic cancer therapy with vaccination using epitope peptides derived from human vascular endothelial growth factor receptor 2. *Cancer research*. 2005;65:4939-46.
- [4] Bernatchez C, Zhu K, Li Y, Andersson H, Ionnides C, Fernandez-Vina M, et al. Altered decamer and nonamer from an HLA-A0201-restricted epitope of Survivin differentially stimulate T-cell responses in different individuals. *Vaccine*. 2011;29:3021-30.
- [5] Liang X, Weigand LU, Schuster IG, Eppinger E, van der Griendt JC, Schub A, et al. A single TCR alpha-chain with dominant peptide recognition in the allorestricted HER2/neu-specific T cell repertoire. *Journal of immunology*. 2010;184:1617-29.
- [6] Mittendorf EA, Holmes JP, Ponniah S, Peoples GE. The E75 HER2/neu peptide vaccine. *Cancer immunology, immunotherapy : CII*. 2008;57:1511-21.
- [7] Tanaka M, Komatsu N, Yanagimoto Y, Oka M, Shichijo S, Okuda S, et al. Development of a new diagnostic tool for pancreatic cancer: simultaneous measurement of antibodies against peptides recognized by cytotoxic T

lymphocytes. *Kurume Med J.* 2006;53:63-70.

[8] Rongcun Y, Salazar-Onfray F, Charo J, Malmberg KJ, Evrin K, Maes H, et al. Identification of new HER2/neu-derived peptide epitopes that can elicit specific CTL against autologous and allogeneic carcinomas and melanomas. *Journal of immunology.* 1999;163:1037-44.

[9] Harao M, Mittendorf EA, Radvanyi LG. Peptide-based vaccination and induction of CD8+ T-cell responses against tumor antigens in breast cancer. *BioDrugs : clinical immunotherapeutics, biopharmaceuticals and gene therapy.* 2015;29:15-30.

[10] Benavides LC, Sears AK, Gates JD, Clifton GT, Clive KS, Carmichael MG, et al. Comparison of different HER2/neu vaccines in adjuvant breast cancer trials: implications for dosing of peptide vaccines. *Expert Rev Vaccines.* 2011;10:201-10.

[11] Justesen S, Buus S, Claesson MH, Pedersen AE. Addition of TAT protein transduction domain and GrpE to human p53 provides soluble fusion proteins that can be transduced into dendritic cells and elicit p53-specific T-cell responses in HLA-A\*0201 transgenic mice. *Immunology.* 2007;122:326-34.

[12] Cicinnati VR, Zhang X, Yu Z, Ferencik S, Schmitz KJ, Dworacki G, et al. Increased frequencies of CD8+ T lymphocytes recognizing wild-type p53-derived epitopes in peripheral blood correlate with presence of epitope loss tumor variants in patients with hepatocellular carcinoma. *International journal of cancer Journal international du cancer.* 2006;119:2851-60.

[13] Dittmann J, Keller-Matschke K, Weinschenk T, Kratt T, Heck T, Becker HD, et al. CD8+ T-cell response against MUC1-derived peptides in gastrointestinal cancer survivors. *Cancer immunology, immunotherapy : CII.* 2005;54:750-8.

[14] Bellone S, Anfossi S, O'Brien TJ, Cannon MJ, Silasi DA, Azodi M, et al. Generation of CA125-specific cytotoxic T lymphocytes in human leukocyte antigen-A2.1-positive healthy donors and patients with advanced ovarian cancer. *Am J Obstet Gynecol.* 2009;200:75 e1-10.

[15] Lee HJ, Hong CY, Jin CJ, Kim MH, Lee YK, Nguyen-Pham TN, et al. Identification of novel HLA-A\*0201-restricted epitopes from anterior gradient-2 as a tumor-associated antigen against colorectal cancer. *Cell Mol Immunol.* 2012;9:175-83.

[16] Shomura H, Shichijo S, Matsueda S, Kawakami T, Sato Y, Todo S, et al. Identification of epidermal growth factor receptor-derived peptides immunogenic for HLA-A2(+) cancer patients. *British journal of cancer.* 2004;90:1563-71.

[17] Filaci G, Fravega M, Setti M, Traverso P, Millo E, Fenoglio D, et al. Frequency of telomerase-specific CD8+ T lymphocytes in patients with cancer. *Blood.* 2006;107:1505-12.

[18] Noguchi M, Moriya F, Koga N, Matsueda S, Sasada T, Yamada A, et al. A randomized phase II clinical trial of personalized peptide vaccination with metronomic low-dose cyclophosphamide in patients with metastatic castration-resistant prostate cancer. *Cancer immunology, immunotherapy : CII.* 2016;65:151-60.

[19] Ito M, Shichijo S, Miyagi Y, Kobayashi T, Tsuda N, Yamada A, et al. Identification of SART3-derived peptides capable of inducing HLA-A2-restricted and tumor-specific CTLs in cancer patients with different HLA-A2 subtypes. *International journal of cancer Journal international du cancer.* 2000;88:633-9.

[20] Rezvani K, Yong AS, Mielke S, Savani BN, Jafarpour B, Eniafe R, et al. Lymphodepletion is permissive to the development of spontaneous T-cell responses to the self-antigen PR1 early after allogeneic stem cell transplantation and in patients with acute myeloid leukemia undergoing WT1 peptide vaccination following chemotherapy. *Cancer immunology, immunotherapy : CII.* 2012;61:1125-36.

[21] Zhao Y, Zheng Z, Khong HT, Rosenberg SA, Morgan RA. Transduction of an HLA-DP4-restricted NY-ESO-1-specific TCR into primary human CD4+ lymphocytes. *Journal of immunotherapy.* 2006;29:398-406.

**Supplemental Table 17.** Side effects of neoantigen based personalized immunotherapy.

|                                 | <b>Grade 1</b> | <b>Grade 2</b> | <b>Grade 3</b> | <b>Grade 4</b> |
|---------------------------------|----------------|----------------|----------------|----------------|
| <b>Constitutional symptom</b>   |                |                |                |                |
| Fever and chills                | 1              | 1              | 0              | 0              |
| Tumor pain                      | 0              | 0              | 0              | 0              |
| Rash                            | 1              | 0              | 0              | 0              |
| Diarrhea                        | 0              | 0              | 0              | 0              |
| Nausea and vomiting             | 1              | 0              | 0              | 0              |
| <b>Respiratory</b>              |                |                |                |                |
| Dyspnea                         | 0              | 0              | 0              | 0              |
| Hypoxia                         | 0              | 0              | 0              | 0              |
| <b>Neurological</b>             |                |                |                |                |
| CNS cerebrovascular ischemia    | 0              | 0              | 0              | 0              |
| <b>Blood/bone marrow</b>        |                |                |                |                |
| Anemia                          | 3              | 0              | 0              | 0              |
| Neutropenia                     | 2              | 0              | 0              | 0              |
| Lymphocytopenia                 | 0              | 0              | 0              | 0              |
| Thrombocytopenia                | 3              | 0              | 0              | 0              |
| <b>Metabolic and laboratory</b> |                |                |                |                |
| AST elevation                   | 1              | 0              | 0              | 0              |
| ALT elevation                   | 1              | 0              | 0              | 0              |
| Scr elevation                   | 0              | 0              | 0              | 0              |
| BUN elevation                   | 0              | 0              | 0              | 0              |

## SUPPLEMENTARY FIGURES

**Supplemental Figure 1. Proportion of neoantigen-reactive CD8+CD137+T cells in the infusion T-cells.** Flow cytometric analysis of 4-1BB expression on the clinical grade infusion T-cells after overnight co-culture with DCs pulsed with mutant peptides (gated on CD3). We depicted a representative data out of three experiments yielding similar results at the first treatment cycle.

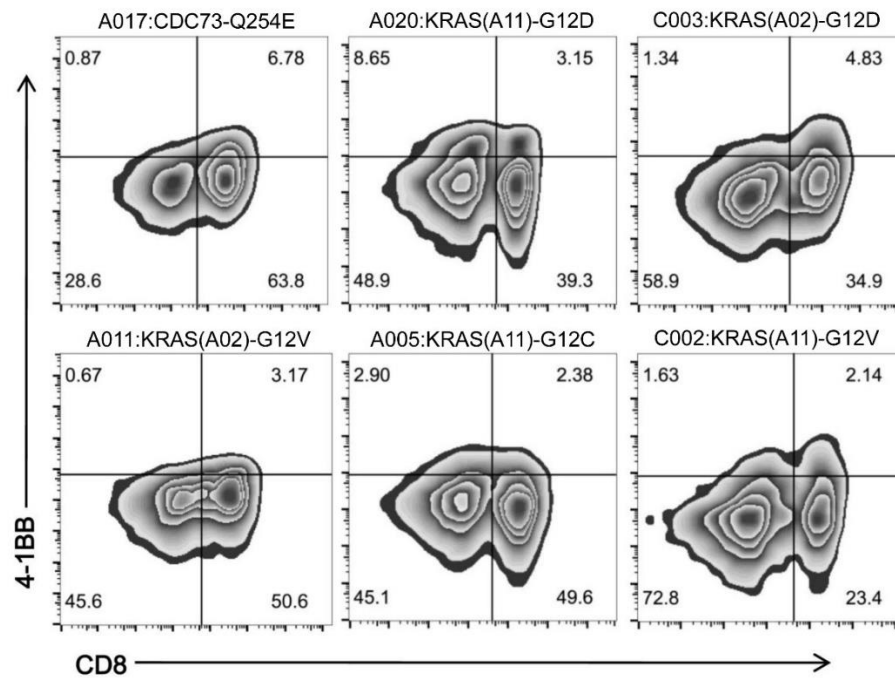



**Supplemental Figure 2. Identification of personalized neoantigens for patient A015 with advanced gastric cancer.** Autologous PBMCs were stimulated with twelve candidate mutant peptides for 10 days, after which IFN- $\gamma$  ELISPOT assays were performed to assess the T-cell specific antigen response. PHA was used as positive control, and no-peptide stimulation was tested as negative control.

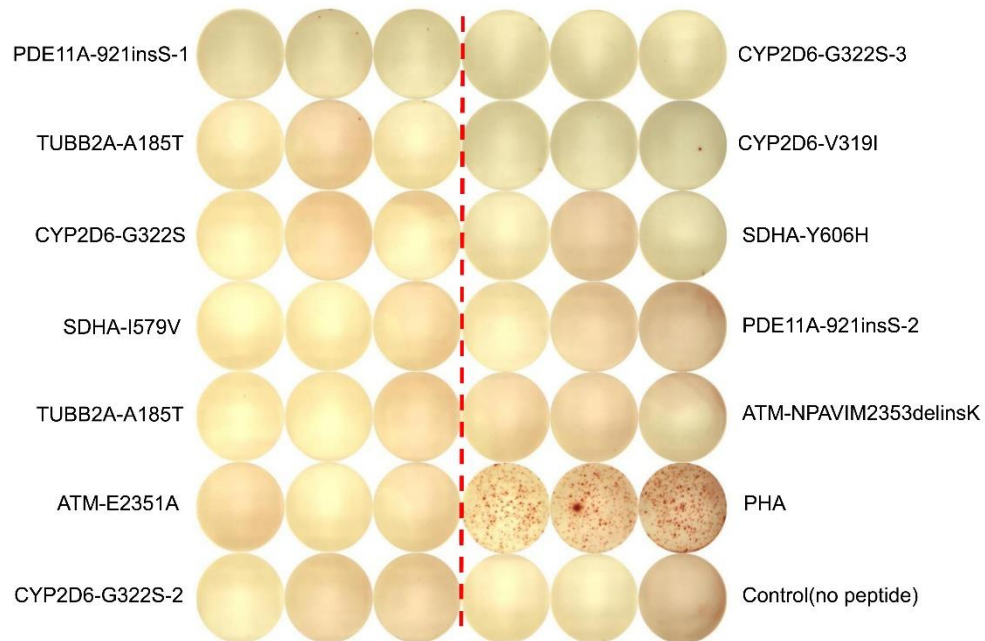

### Supplemental Figure 3. Antigen specific cytotoxicity of clinical grade neoantigen reactive T cells.

(A) Clinical grade NRTs (bulk T cells) from five patients were each cocultured with CFSE labeled T2/T2-A11 cells that pulsed with corresponding mutant peptides, at ratios (E:T) of 2.5:1, 5:1, 10:1, 20:1, 40:1, respectively. After 6 h, the PI+ CFSE+ T cells were analyzed by FACS. No peptide-pulsed T2/T2-A11 cells were used as a negative control. (B) Tetramer+CD8+T of bulk T cells from patient C002 and A005 were isolated using FACS Aria sorter, and the purified T cells were expanded to large numbers with IL-2, anti-CD3 Ab, and irradiated feeder cells(K562-A11). After sorting and expansion, antigen specific cytotoxicity of enriched T cells were performed at ratios (E:T) of 2.5:1, 5:1, 10:1, 20:1, respectively. All Cytotoxicity data are presented as mean  $\pm$  S.E.M.,  $n=3$ , \* $P < 0.05$ , \*\* $P < 0.01$ , \*\*\* $P < 0.001$ , \*\*\*\* $P < 0.0001$ , by 2-tailed Student t-test.

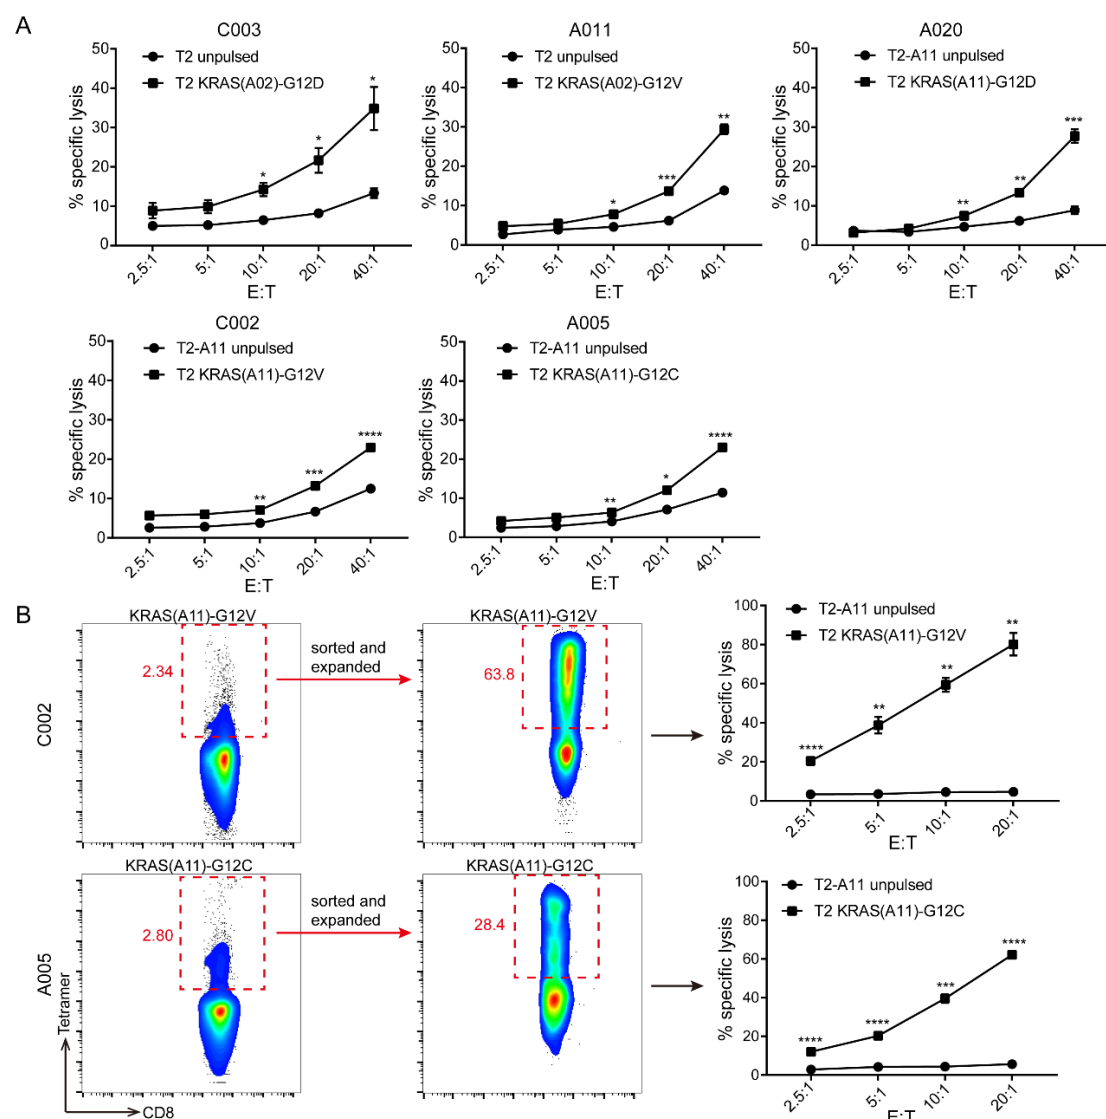

#### Supplemental Figure 4. Correlation between CD137 and intracellular cytokine expression.

The enriched KRAS(A11)-G12V specific T cells (63.8% of tetramer+CD8+T cells, see Supplemental Figure 3) from patient C002 (A) and KRAS(A11)-G12C specific T cells (28.4% of tetramer+CD8+T cells, see Supplemental Figure 3) from patient A005 (B) were cocultured with K562-A11 cells pulsed with the corresponding neoantigen peptides at an E:T ratio of 5:1 for 24h, respectively. CD137 and intracellular IFN- $\gamma$  or TNF- $\alpha$  staining were performed in parallel (gated on CD8). Experiments were performed in triplicates, and the representative data was shown.

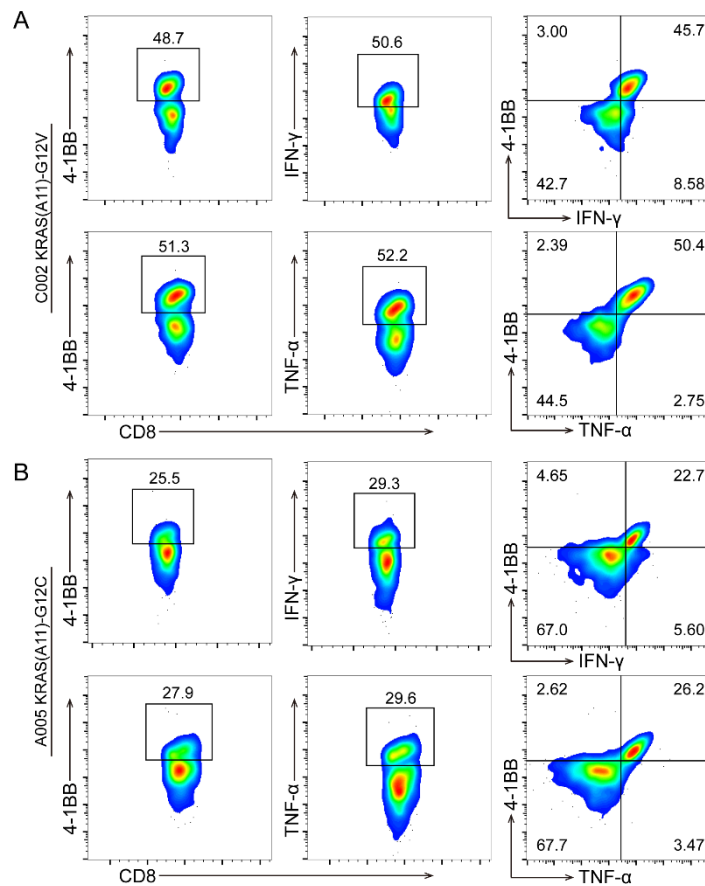

### Supplemental Figure 5. The memory and activation phenotype analysis of infusion T-cells.

Before T-cell infusion, FACS was performed to characterize the memory and activation phenotype. CD45RO+CD62L+, CD45RO+CD62L- and CD45RO-CD62L+ cells were analyzed by gating on CD3+ cells. The representative data are depicted. Data are representative experiments depicted (n=3).

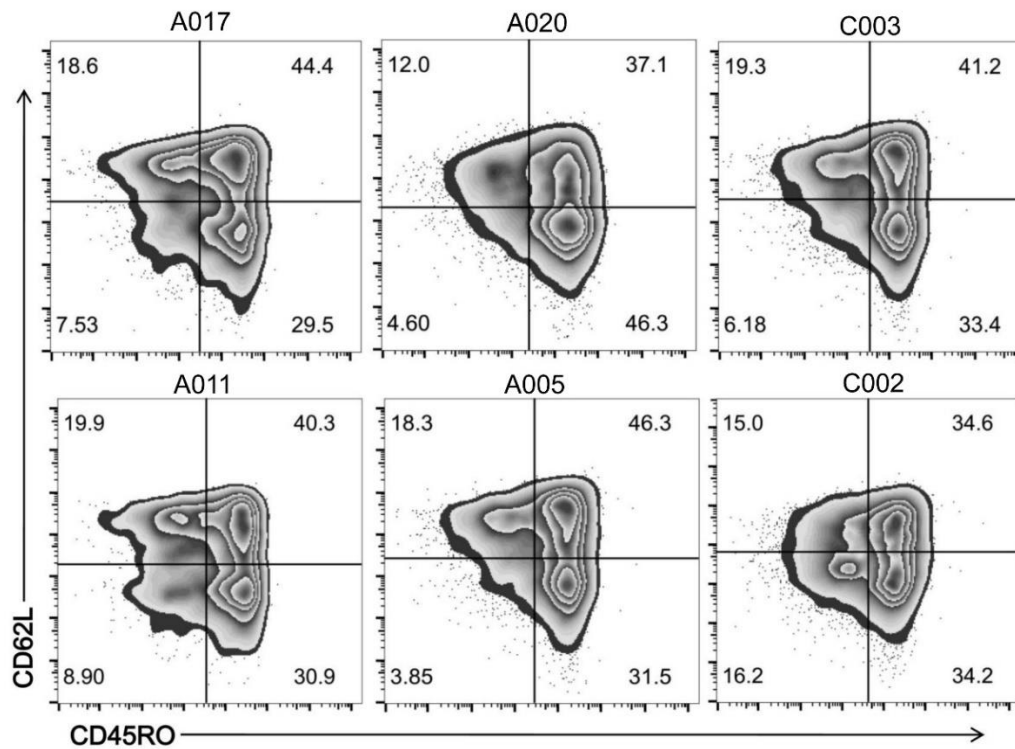

Supplement: sd1 [file 1]
